# Supplementary material for: Efficacy of a T Cell-Biased Adenovirus Vector as a Zika Virus Vaccine
Source: PubMed Central journal article supplement (PMC6301965; doi:10.1038/s41598-018-35755-z), 2018-12-20
Supplement: 41598_2018_35755_MOESM1_ESM.pdf [file 41598_2018_35755_MOESM1_ESM.pdf]

**Efficacy of a T Cell-Biased Adenovirus Vector as a Zika Virus Vaccine**

Brianna L. Bullard<sup>1</sup>, Brigette N. Corder<sup>1</sup>, Matthew J. Gorman<sup>2</sup>,  
Michael S. Diamond<sup>2</sup>, and Eric A. Weaver<sup>1\*</sup>

# Supplementary Figure 1

prM

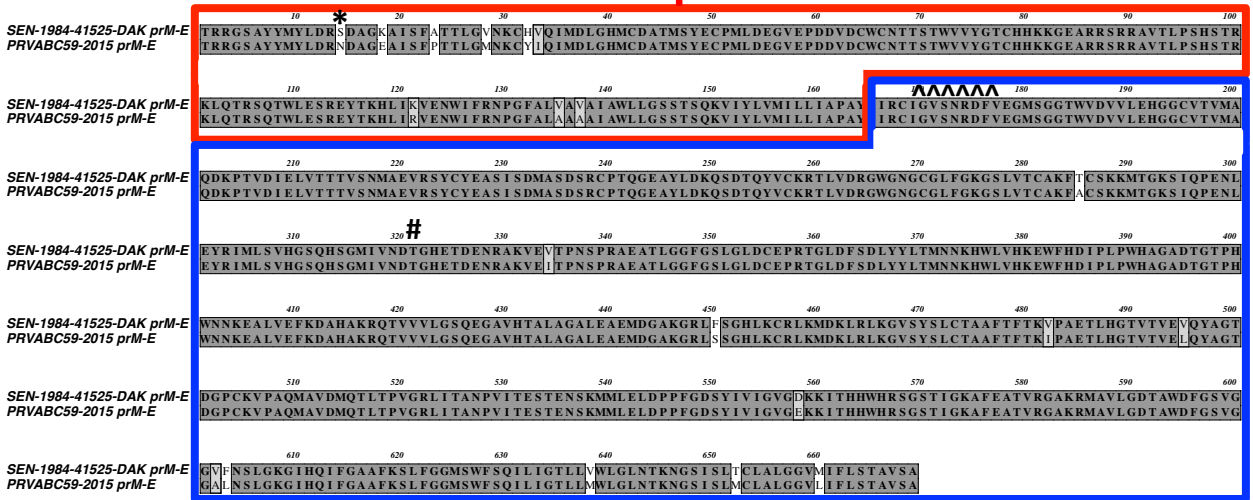

Envelope

## Supplementary Figure 1

### Alignment of the African strain ZIKV Dakar 41525 to the Asian strain ZIKV PRVABC59.

A ClustalW alignment of the prM-E region from the African ZIKV Dakar 41525 strain used in the challenge studies and the Asian ZIKV PRVABC59 strain used in the construction of the vectored vaccine. The CD8<sup>+</sup> T cell epitope E<sub>4-12</sub> is indicated by a ^ symbol(37). The \* symbol indicates a S139N mutation that is associated with increased virulence in neural progenitor cells (54). The # symbol indicates a motif associate with increased virulence (55).

## Supplementary Table 1

| Peptide # | Sequence        | Position (E#1-504) |
|-----------|-----------------|--------------------|
| 1         | IRCIGVSNRDFVEGM | 1-15               |
| 2         | IGVSNRDFVEGMSGG | 4-18               |
| 3         | SNRDFVEGMSGGTWV | 7-21               |
| 6         | SGGTWVDVLEHGGC  | 16-30              |
| 8         | DVLEHGGCVTMAQ   | 22-36              |
| 19        | EVRSYCYEASISDMA | 55-69              |
| 21        | YEASISDMASDSRCP | 61-75              |
| 24        | SDSRCPTQGEAYLDK | 70-84              |
| 25        | RCPTQGEAYLDKQSD | 73-87              |
| 102       | SYSLCTAAFTFKIP  | 304-318            |
| 103       | LCTAAFTFKIPAET  | 307-321            |
| 104       | AAFTFKIPAETLHG  | 310-324            |
| 119       | VGRLITANPVITEST | 355-369            |
| 120       | LITANPVITESTENS | 358-372            |
| 123       | ESTENSKMMLELDPP | 367-381            |
| 124       | ENSKMMLELDPPFGD | 370-384            |

### Supplementary Table 1

#### The positive peptides in T-cell mapping of the E region of ZIKV.

The peptides determined to be positive during the T-cell mapping of the Envelope region of ZIKV as indicated in Fig. 3. Peptides were positive if the response was 4 times that of the PBS sham vaccinated mice. Amino acid sequence and position number on the E protein are indicated.

Supplementary Figure 2

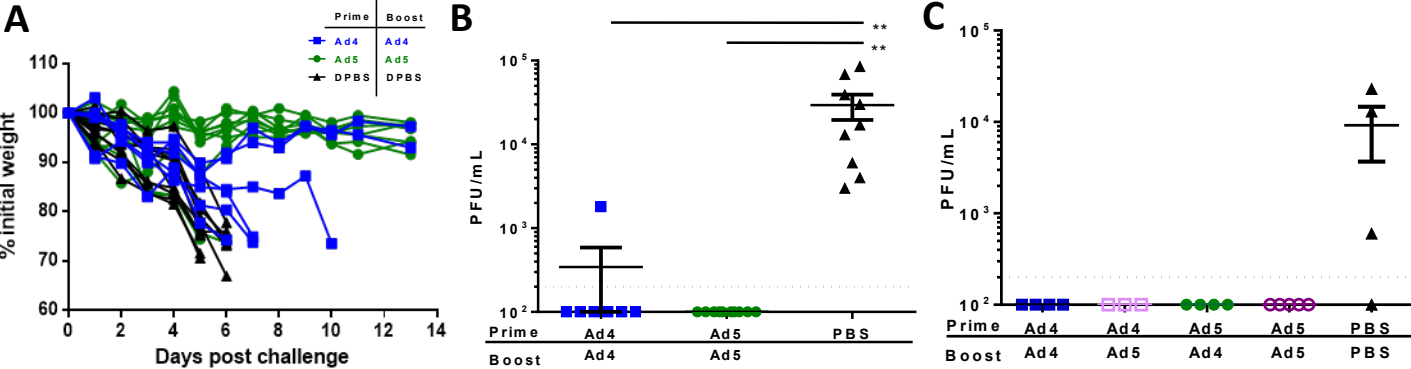

Supplementary Figure 2

**Individual mice weight loss during the *lfnar1*<sup>-/-</sup> mice challenge and viremia on day 4 post infection based on plaque assay.**

The individual mouse weights during the challenge of the *lfnar1*<sup>-/-</sup> mice in Fig. 5 are plotted in (A). The plaque forming units per mL (PFU/mL) in the sera at day 4 post infection in the *lfnar1*<sup>-/-</sup> challenge model (B) (p<0.01; one-way ANOVA) and anti-*lfnar1* challenge model (C). Data are expressed as the mean with standard error (SEM).

500 vp/cell

1 MOI

Ad5-  
prME

Ad4-  
prME

Ad5-  
prME

Ad4-  
prME

Uninfected

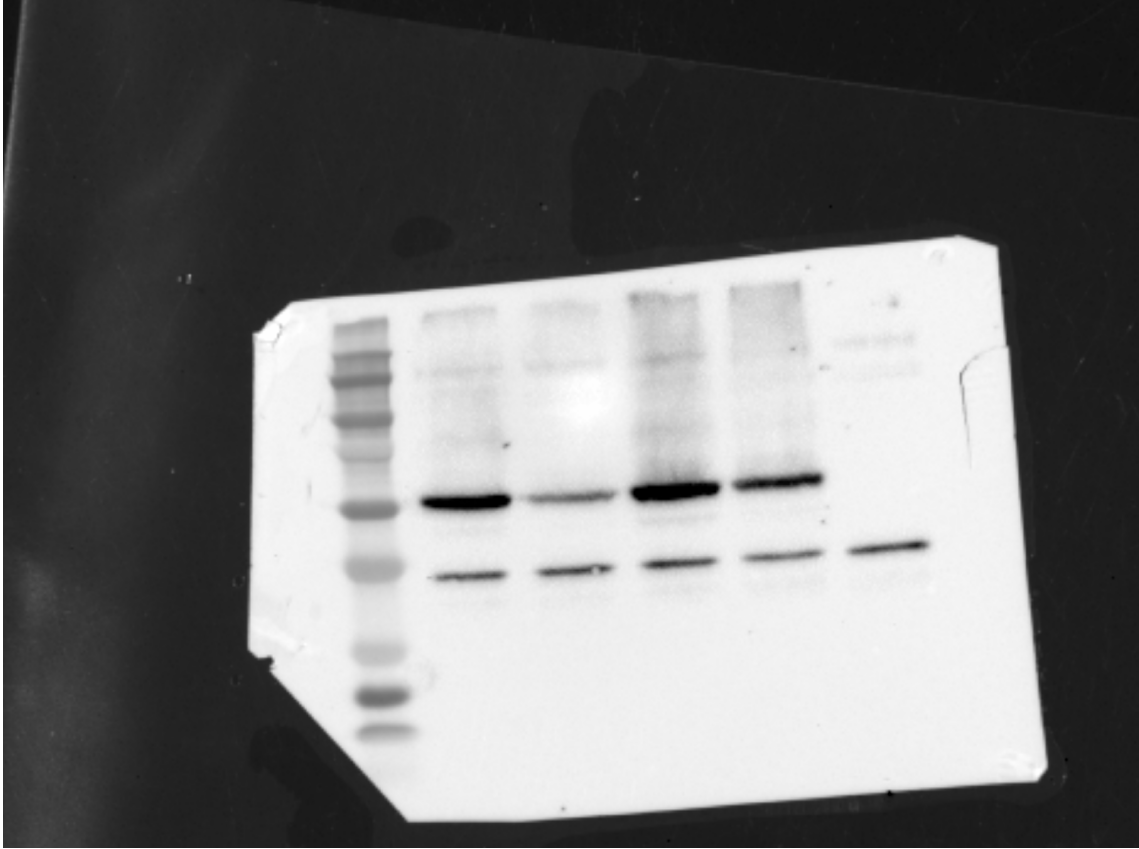

ZIKV-E  
GAPDH
